# Supplementary material for: Cholic acid micelles—controlling the size of the aqueous cavity by PEGylation
Source: Royal Society of Chemistry journal article supplement (doi:10.1039/b914440d), 2010-01-01
Supplement: b914440d.pdf [file b914440d.pdf]

## B914440D

### Appendix: The derivation of the energetic terms $\Delta G_i$ ( $i = \overline{1,3}$ ) describing the micellar process (eq. 3)

Contributions to  $\Delta G$  include<sup>16</sup> the energy required to form a cavity in the solvent, which will be occupied by the micelle ( $\Delta G_1$ ), the energy needed to bring the hydrophobic moieties of the interacting molecules together to fill this cavity ( $\Delta G_2$ ) and the energy cost for placing the hydrophilic patches (the hydroxy groups) on micelle surface ( $\Delta G_3$ ).

$\Delta G_1$  represents the energy required to form a cavity in the solvent that will be occupied by the micelle (see the blue marked region in Fig. 2a). This is  $\Delta G_1 = \gamma A$ , where  $A$  represents the surface area of the cavity and  $\gamma$  stands for the water-vapor surface tension. The CA units (or CA-PEG<sub>4</sub>, for PEGylated CA systems) arrange themselves so that their hydrophobic moieties are lying toward each other, forming a hydrophobic cavity (see the magenta marked region in Fig. 2a) that can contains  $n_w$  water molecules. In the spherical symmetry approximation, the radius ( $R$ ) and surface area ( $A$ ) of the micelle can be approximated by  $R \cong (3/4\pi(nV_{CA} + n_w v_w))^{1/3}$  and  $A \cong (6\pi^{1/2}(nV_{CA} + n_w v_w))^{2/3}$ , respectively. Here  $V_{CA}$  is the molecular volume of the CA molecule,  $V_{CA} \cong ASA\delta$ , and  $v_w \sim a_w^3$  stands for the volume of a water molecule. Therefore, we can write  $\Delta G_1 = \gamma A \cong 4.84\gamma(nV_{CA} + n_w v_w)^{2/3}$ .

$\Delta G_2$  is the energy needed to bring the interacting molecules together to fill the cavity, which is given by  $\Delta G_2 \cong -n\Delta\mu_{CA} - \Delta\gamma A$ , where  $\Delta\gamma = \gamma - \gamma_{ow}$  with  $\gamma_{ow}$  standing for the interface tension between water and hydrophobe ( $\gamma > \gamma_{ow}$ ). The surface area  $A$  is approximated by  $A \cong (6\pi^{1/2}(nV_{CA} + n_w v_w))^{2/3}$ , as seen in above, and

$\Delta\mu_{CA}$  is given by eqn. 2.  $\Delta G_2$  can be written as

$$\Delta G_2 \cong -n\Delta\mu_{CA} - 4.84(\gamma - \gamma_{ow})(nV_{CA} + n_w v_w)^{2/3}.$$

Finally,  $\Delta G_3$  reflects the energy cost for placing the polar ends on micelle surface.

Usually, this is estimated from the electrostatic analogy of stoichiometric constraints<sup>17</sup> by  $\beta\Delta G_3 \cong 1.96nL^2/\delta^2$ , where  $\delta$  represents the mean separation distance between polar tails and  $CH_3$  groups and  $L$  is the radial distance occupied by surfactant molecules in the micelle (see Fig. 2a). The latter can readily be approximated by

$$L \cong R - (3/4\pi n_w v_w)^{1/3},$$

where the radius of the micelle is

$$R \cong (3/4\pi(nV_{CA} + n_w v_w))^{1/3}.$$

So that, the energy cost for placing the polar groups on the spherical hydrophobic surface can be written as

$$\Delta G_3 \cong 0.76\beta^{-1}n\delta^{-2}\left[(nV_{CA} + n_w v_w)^{1/3} - (n_w v_w)^{1/3}\right]^2$$
